# Supplementary material
Source: publisher figshare collection journal article supplement (https://tandf.figshare.com/ndownloader/files/14167043)
Supplement: Supplementary file 1 [file 14167043]

**Supplementary information**

**Occurrence of emerging mycotoxins in cereals and cereal-based products from the Korean market using LC-MS/MS**

Dan-Bi Kima1, Nho-Eul Songa1, Tae Gyu Nama, Sanghee Leea, Dongwon Seoa, Miyoung Yooa,*

*a Food Analysis Center, Korea Food Research Institute, Wanju 55365,****Korea***

***Corresponding author:** Miyoung Yoo Ph.D.

*Food Analysis Center, Korea Food Research Institute*

*Wanju-gun, Jeollabuk-do, 55365, Republic of Korea*

Tel.: +82-63-219-9342;

Fax: +82-63-219-9280

E-mail: [myyoo@kfri.re.kr](mailto:myyoo@kfri.re.kr) (Miyoung Yoo)


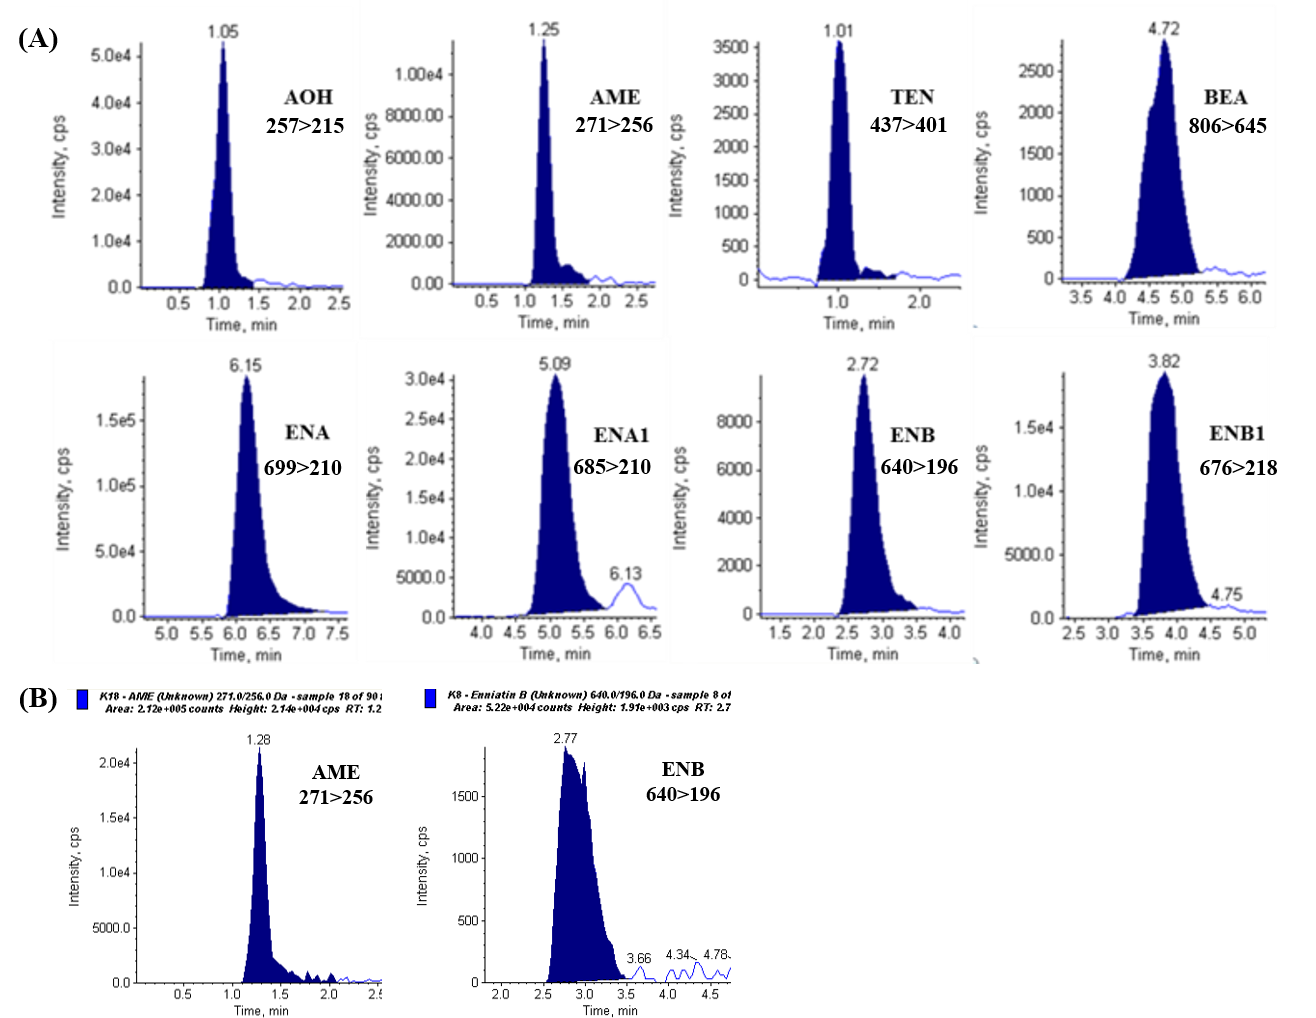


Fig. S1. UPLC-MS/MS chromatogram of emerging mycotoxins at the highest concentration of standard solution (A) and chromatograms obtained in multiple reaction monitoring (MRM) mode of cereal samples naturally contaminated with AME and ENB (B).
